# Supplementary material for: Increased levels of the oxidative stress biomarker 8-iso-prostaglandin F2α in wastewater associated with tobacco use
Source: PubMed Central journal article supplement (PMC5157025; doi:10.1038/srep39055), 2016-12-15
Supplement: srep39055-s1.pdf [file srep39055-s1.pdf]

## Supplementary Information

# Increased levels of the oxidative stress biomarker 8-iso-prostaglandin F<sub>2α</sub> in wastewater associated with tobacco use

Yeonsuk Ryu<sup>1,2,\*</sup>, Emma Gracia-Lor<sup>3,4</sup>, Richard Bade<sup>4</sup>, J.A. Baz-Lomba<sup>1,2</sup>, Jørgen G. Bramness<sup>2</sup>, Sara Castiglioni<sup>3</sup>, Erika Castrignanò<sup>5</sup>, Ana Causanilles<sup>6</sup>, Adrian Covaci<sup>7</sup>, Pim de Voogt<sup>6,8</sup>, Felix Hernandez<sup>4</sup>, Barbara Kasprzyk-Hordern<sup>5</sup>, Juliet Kinyua<sup>7</sup>, Ann-Kathrin McCall<sup>9</sup>, Christoph Ort<sup>9</sup>, Benedek G. Plósz<sup>10</sup>, Pedram Ramin<sup>10</sup>, Nikolaos I. Rousis<sup>3</sup>, Malcolm J. Reid<sup>1</sup>, and Kevin V. Thomas<sup>1</sup>

<sup>1</sup>Norwegian Institute for Water Research (NIVA), Gaustadalléen 21, NO-0349 Oslo, Norway

<sup>2</sup>Norwegian Centre for Addiction Research, Faculty of Medicine, University of Oslo, PO box 1078 Blindern, 0316 Oslo, Norway

<sup>3</sup>IRCCS–Istituto di Ricerche Farmacologiche “Mario Negri”, Department of Environmental Health Sciences, Via La Masa 19, 20156, Milan, Italy

<sup>4</sup>Research Institute for Pesticides and Water, University Jaume I, Avda. Sos Baynat, E-12071 Castellón, Spain

<sup>5</sup>Department of Chemistry, University of Bath, Claverton Down, Bath BA2 7AY, UK

<sup>6</sup>KWR Watercycle Research Institute, Chemical Water Quality and Health, P.O. Box 1072, 3430 BB Nieuwegein, The Netherlands

<sup>7</sup>Toxicological Center, Department of Pharmaceutical Sciences, Campus Drie Eiken, University of Antwerp, Universiteitsplein 1, 2610 Wilrijk, Belgium

<sup>8</sup>Institute for Biodiversity and Ecosystem Dynamics (IBED), University of Amsterdam, Science Park 904, 1098 XH Amsterdam, The Netherlands

<sup>9</sup>Eawag, Swiss Federal Institute of Aquatic Science and Technology, CH 8600 Dübendorf, Switzerland

<sup>10</sup>Department of Environmental Engineering, Technical University of Denmark, Miljøvej, Building 115, 2800 Kgs. Lyngby, Denmark

\*Corresponding author. E-mail: yeonsuk.ryu@niva.no, Tel: +47 22 18 51 00

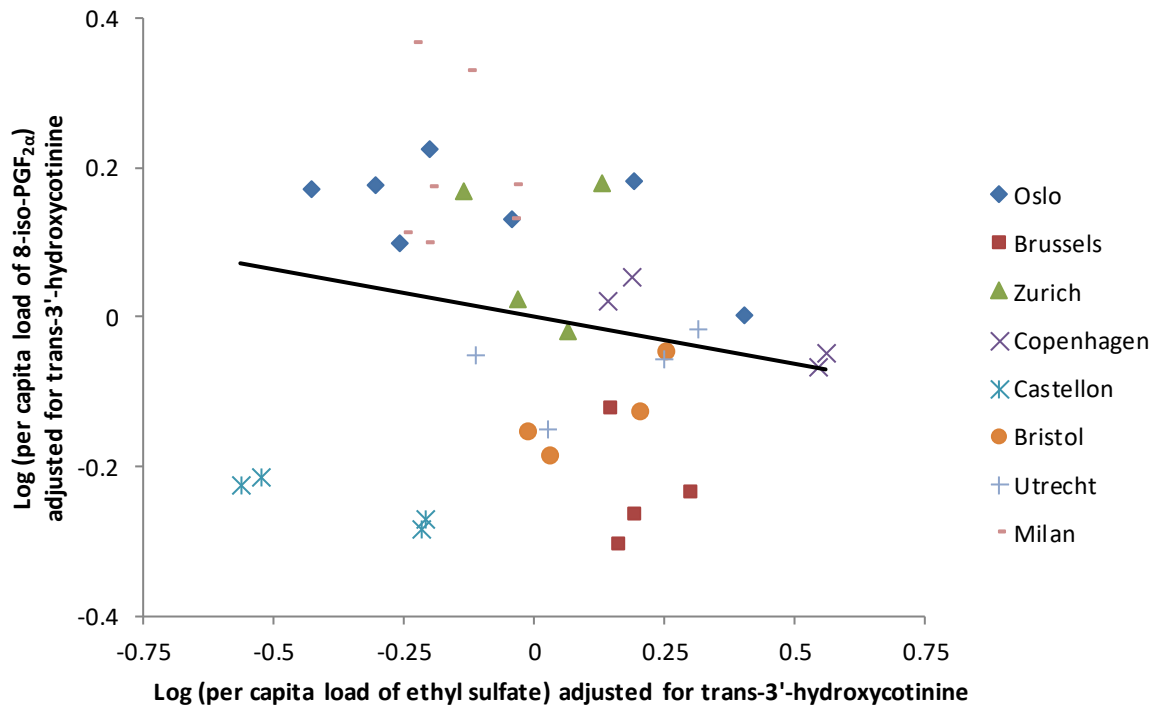

Supplementary Figure S1. Partial regression plot between log 8-iso-PGF<sub>2α</sub> and log ethyl sulfate from the multiple linear regression analysis based on both weekday and weekend. 8-iso-PGF<sub>2α</sub> data for Oslo was taken from our previous report<sup>1</sup>.

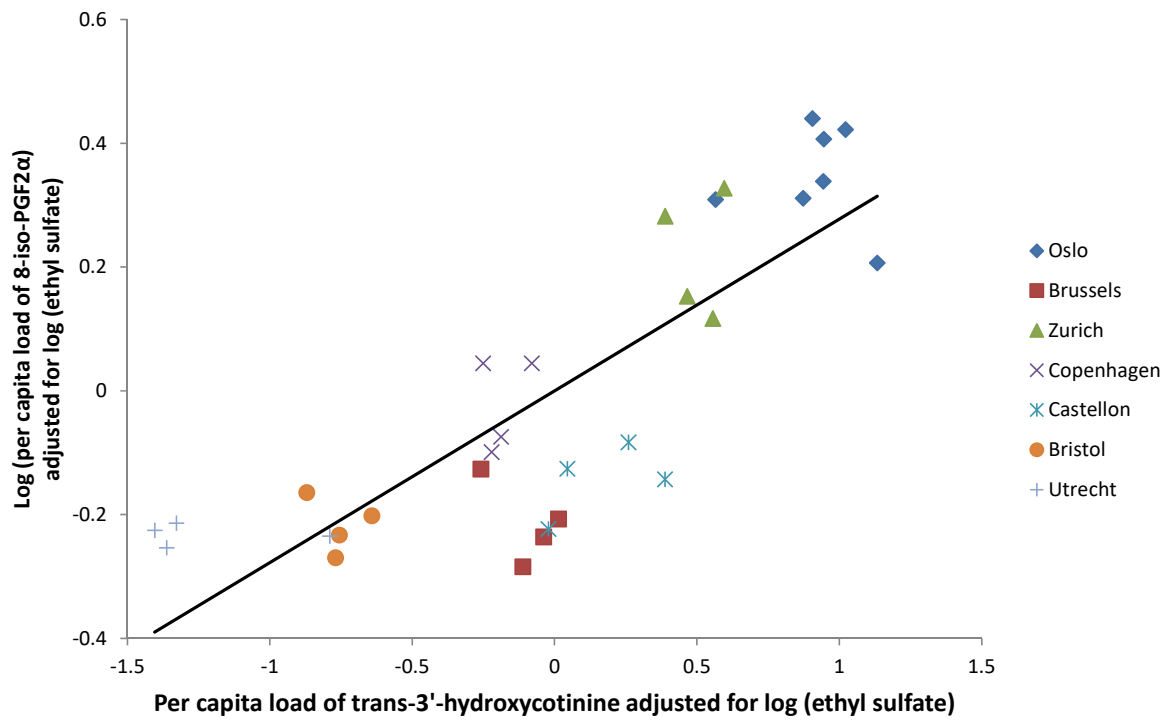

Supplementary Figure S2. Partial regression plot between log 8-iso-PGF<sub>2α</sub> and trans-3'-hydroxycotinine from the multiple linear regression analysis performed after excluding Milan data. 8-iso-PGF<sub>2α</sub> data for Oslo was taken from our previous report<sup>1</sup>.

Supplementary Table S1. Concentration of biomarkers and sewage flow in participating cities during the sampling period.

| City            | Population | Sampling start | Sampling end | Day | Sewage volume (m <sup>3</sup> /day) | 8-iso-PGF <sub>2α</sub> (ng/L) | ethyl sulfate (ng/mL) | trans-3'-hydroxycotinine (ng/mL) |
|-----------------|------------|----------------|--------------|-----|-------------------------------------|--------------------------------|-----------------------|----------------------------------|
| Brussels (BE)   | 953987     | 20/03/2015     | 21/03/2015   | Fri | 234906                              | 10.6                           | 22.4                  | 9.0                              |
|                 | 953987     | 21/03/2015     | 22/03/2015   | Sat | 233096                              | 11.9                           | 29.8                  | 9.5                              |
|                 | 953987     | 23/03/2015     | 24/03/2015   | Mon | 234774                              | 9.4                            | 20.3                  | 8.6                              |
|                 | 953987     | 24/03/2015     | 25/03/2015   | Tue | 359951                              | 8.7                            | 12.0                  | 5.2                              |
| Zurich (CH)     | 410000     | 18/03/2015     | 19/03/2015   | Wed | 157084                              | 15.2                           | 12.9                  | 7.3                              |
|                 | 410000     | 19/03/2015     | 20/03/2015   | Thu | 161005                              | 15.4                           | 9.6                   | 6.8                              |
|                 | 410000     | 21/03/2015     | 22/03/2015   | Sat | 200010                              | 18.0                           | 6.3                   | 5.6                              |
|                 | 410000     | 22/03/2015     | 23/03/2015   | Sun | 243013                              | 14.6                           | 9.3                   | 4.5                              |
| Copenhagen (DK) | 531000     | 10/03/2015     | 11/03/2015   | Tue | 150936                              | 17.2                           | 16.9                  | 7.6                              |
|                 | 531000     | 11/03/2015     | 12/03/2015   | Wed | 147175                              | 17.8                           | 18.2                  | 7.2                              |
|                 | 531000     | 14/03/2015     | 15/03/2015   | Sat | 137793                              | 16.6                           | 49.5                  | 8.6                              |
|                 | 531000     | 15/03/2015     | 16/03/2015   | Sun | 137244                              | 15.6                           | 47.5                  | 8.4                              |
| Castellon (ES)  | 180690     | 27/03/2015     | 28/03/2015   | Fri | 43728                               | 11.9                           | 9.9                   | 10.3                             |
|                 | 180690     | 28/03/2015     | 29/03/2015   | Sat | 38301                               | 13.8                           | 5.0                   | 10.4                             |
|                 | 180690     | 30/03/2015     | 31/03/2015   | Mon | 37469                               | 11.2                           | 9.9                   | 9.9                              |
|                 | 180690     | 31/03/2015     | 01/04/2015   | Tue | 40476                               | 11.5                           | 4.0                   | 8.8                              |
| Milan (IT)      | 1100000    | 04/02/2015     | 05/02/2015   | Wed | 403960                              | 9.9                            | 4.1 <sup>b</sup>      | 2.7                              |
|                 | 1100000    | 05/02/2015     | 06/02/2015   | Thu | 673970                              | 11.0                           | 3.1 <sup>b</sup>      | 1.9                              |
|                 | 1100000    | 06/02/2015     | 07/02/2015   | Fri | 660810                              | 10.6                           | 2.3 <sup>b</sup>      | 1.4                              |
|                 | 1100000    | 07/02/2015     | 08/02/2015   | Sat | 469900                              | 9.8                            | 5.0 <sup>b</sup>      | 2.1                              |
|                 | 1100000    | 08/02/2015     | 09/02/2015   | Sun | 395410                              | 10.2                           | 5.7 <sup>b</sup>      | 2.3                              |
|                 | 1100000    | 09/02/2015     | 10/02/2015   | Mon | 423340                              | 11.2                           | 3.9 <sup>b</sup>      | 2.5                              |
|                 | 1100000    | 10/02/2015     | 11/02/2015   | Tue | 424210                              | 10.0                           | 3.6 <sup>b</sup>      | 2.7                              |
| Utrecht (NL)    | 300000     | 04/03/2015     | 05/03/2015   | Wed | 47740                               | 14.6                           | 10.7                  | 4.5                              |
|                 | 300000     | 05/03/2015     | 06/03/2015   | Thu | 45030                               | 15.9                           | 18.9                  | 9.0                              |

|                |        |            |            |         |         |                   |                   |                 |
|----------------|--------|------------|------------|---------|---------|-------------------|-------------------|-----------------|
|                | 300000 | 07/03/2015 | 08/03/2015 | Sat     | 46030   | 15.7              | 26.4              | 5.5             |
|                | 300000 | 08/03/2015 | 09/03/2015 | Sun     | 46900   | 16.7              | 29.8              | 5.3             |
| Hamar (NO)     | 55000  | 14/11/2014 | 17/11/2014 | Fri-Sun | 66207   | 10.3              | NA <sup>c</sup>   | NA <sup>c</sup> |
|                | 55000  | 17/11/2014 | 18/11/2014 | Mon     | 24881   | 11.8              | NA <sup>c</sup>   | NA <sup>c</sup> |
|                | 55000  | 21/11/2014 | 24/11/2014 | Fri-Sun | 80516   | 9.6               | NA <sup>c</sup>   | NA <sup>c</sup> |
|                | 55000  | 25/11/2014 | 26/11/2014 | Tue     | 42669   | 9.4               | NA <sup>c</sup>   | NA <sup>c</sup> |
|                | 55000  | 28/11/2014 | 01/12/2014 | Fri-Sun | 80488   | 10.5              | NA <sup>c</sup>   | NA <sup>c</sup> |
|                | 55000  | 03/12/2014 | 04/12/2014 | Wed     | 25153   | 11.9              | NA <sup>c</sup>   | NA <sup>c</sup> |
|                | 55000  | 05/12/2014 | 08/12/2014 | Fri-Sun | 63992   | 11.3              | NA <sup>c</sup>   | NA <sup>c</sup> |
|                | 55000  | 11/12/2014 | 12/12/2014 | Thu     | 21655   | 11.3              | NA <sup>c</sup>   | NA <sup>c</sup> |
| Oslo (NO)      | 580639 | 05/11/2014 | 06/11/2014 | Wed     | 491702  | 14.8              | NA <sup>c</sup>   | NA <sup>c</sup> |
|                | 580639 | 07/11/2014 | 10/11/2014 | Fri-Sun | 1313833 | 14.6              | NA <sup>c</sup>   | NA <sup>c</sup> |
|                | 580639 | 12/11/2014 | 13/11/2014 | Wed     | 416186  | 15.6              | NA <sup>c</sup>   | NA <sup>c</sup> |
|                | 580639 | 14/11/2014 | 17/11/2014 | Fri-Sun | 1299286 | 15.3              | NA <sup>c</sup>   | NA <sup>c</sup> |
|                | 580639 | 19/11/2014 | 20/11/2014 | Wed     | 268451  | 15.1              | NA <sup>c</sup>   | NA <sup>c</sup> |
|                | 580639 | 21/11/2014 | 24/11/2014 | Fri-Sun | 851342  | 17.0              | NA <sup>c</sup>   | NA <sup>c</sup> |
|                | 580639 | 26/11/2014 | 27/11/2014 | Wed     | 361952  | 14.6              | NA <sup>c</sup>   | NA <sup>c</sup> |
|                | 580639 | 28/11/2014 | 01/12/2014 | Fri-Sun | 779316  | 13.9              | NA <sup>c</sup>   | NA <sup>c</sup> |
|                | 580639 | 11/03/2015 | 12/03/2015 | Wed     | 332093  | 19.8 <sup>a</sup> | 5.1 <sup>b</sup>  | 5.3             |
|                | 580639 | 12/03/2015 | 13/03/2015 | Thu     | 306596  | 19.1 <sup>a</sup> | 4.3 <sup>b</sup>  | 5.8             |
|                | 580639 | 13/03/2015 | 14/03/2015 | Fri     | 275737  | 20.0 <sup>a</sup> | 9.1 <sup>b</sup>  | 6.6             |
|                | 580639 | 14/03/2015 | 15/03/2015 | Sat     | 255126  | 21.6 <sup>a</sup> | 15.4 <sup>b</sup> | 6.5             |
|                | 580639 | 15/03/2015 | 16/03/2015 | Sun     | 248717  | 19.4 <sup>a</sup> | 32.0 <sup>b</sup> | 8.3             |
|                | 580639 | 16/03/2015 | 17/03/2015 | Mon     | 252838  | 18.9 <sup>a</sup> | 5.7 <sup>b</sup>  | 6.9             |
|                | 580639 | 17/03/2015 | 18/03/2015 | Tue     | 251013  | 23.3 <sup>a</sup> | 4.0 <sup>b</sup>  | 7.1             |
| Stavanger (NO) | 240000 | 24/10/2014 | 27/10/2014 | Fri-Sun | 493562  | 13.9              | NA <sup>c</sup>   | NA <sup>c</sup> |
|                | 240000 | 06/11/2014 | 07/11/2014 | Thu     | 118568  | 17.0              | NA <sup>c</sup>   | NA <sup>c</sup> |
|                | 240000 | 07/11/2014 | 10/11/2014 | Fri-Sun | 393481  | 15.5              | NA <sup>c</sup>   | NA <sup>c</sup> |
|                | 240000 | 17/11/2014 | 18/11/2014 | Mon     | 87215   | 14.3              | NA <sup>c</sup>   | NA <sup>c</sup> |
|                | 240000 | 21/11/2014 | 24/11/2014 | Fri-Sun | 311918  | 16.8              | NA <sup>c</sup>   | NA <sup>c</sup> |

|              |        |            |            |         |        |      |                 |                 |
|--------------|--------|------------|------------|---------|--------|------|-----------------|-----------------|
|              | 240000 | 27/11/2014 | 28/11/2014 | Thu     | 118400 | 15.9 | NA <sup>c</sup> | NA <sup>c</sup> |
|              | 240000 | 02/12/2014 | 03/12/2014 | Tue     | 84802  | 17.7 | NA <sup>c</sup> | NA <sup>c</sup> |
|              | 240000 | 05/12/2014 | 08/12/2014 | Fri-Sun | 397626 | 16.0 | NA <sup>c</sup> | NA <sup>c</sup> |
| Tromsø (NO)  | 20000  | 04/02/2015 | 05/02/2015 | Wed     | 6872   | 15.0 | NA <sup>c</sup> | NA <sup>c</sup> |
|              | 20000  | 06/02/2015 | 09/02/2015 | Fri-Sun | 28507  | 16.4 | NA <sup>c</sup> | NA <sup>c</sup> |
|              | 20000  | 10/02/2015 | 11/02/2015 | Tue     | 11327  | 16.2 | NA <sup>c</sup> | NA <sup>c</sup> |
|              | 20000  | 13/02/2015 | 16/02/2015 | Fri-Sun | 21276  | 17.4 | NA <sup>c</sup> | NA <sup>c</sup> |
|              | 20000  | 18/02/2015 | 19/02/2015 | Wed     | 8059   | 15.9 | NA <sup>c</sup> | NA <sup>c</sup> |
|              | 20000  | 20/02/2015 | 23/02/2015 | Fri-Sun | 33915  | 15.0 | NA <sup>c</sup> | NA <sup>c</sup> |
|              | 20000  | 24/02/2015 | 25/02/2015 | Tue     | 7973   | 16.9 | NA <sup>c</sup> | NA <sup>c</sup> |
|              | 20000  | 27/02/2015 | 02/03/2015 | Fri-Sun | 27837  | 16.0 | NA <sup>c</sup> | NA <sup>c</sup> |
| Bristol (UK) | 886650 | 12/03/2015 | 13/03/2015 | Thu     | 197523 | 13.6 | 21.8            | 6.1             |
|              | 886650 | 14/03/2015 | 15/03/2015 | Sat     | 220687 | 11.1 | 18.6            | 6.4             |
|              | 886650 | 15/03/2015 | 16/03/2015 | Sun     | 193194 | 10.1 | 13.4            | 6.3             |
|              | 886650 | 16/03/2015 | 17/03/2015 | Mon     | 197493 | 10.6 | 11.9            | 6.1             |

<sup>a</sup>Data from Ryu et al. (2015)<sup>1</sup>

<sup>b</sup>Data from Ryu et al. (2016)<sup>2</sup>

<sup>c</sup>Not analysed.

Supplementary Table S2. LC-MS/MS conditions for the analysis of 8-iso-PGF<sub>2α</sub> in Milan samples.

|                  |                                                                                  |                             |                             |                                                     |                  |                 |             |
|------------------|----------------------------------------------------------------------------------|-----------------------------|-----------------------------|-----------------------------------------------------|------------------|-----------------|-------------|
| HPLC pump        | Agilent 1200 Series<br>(Santa Clara, CA, USA)                                    |                             | Mass Spectrometer           | API 5500 QqQ (AB Sciex, Thornhill, Ontario, Canada) |                  |                 |             |
| Autosampler      | 4 °C                                                                             |                             | Interface                   | Turbo Ion Spray                                     |                  |                 |             |
| Injection volume | 4 µL                                                                             |                             | Polarity                    | Negative                                            |                  |                 |             |
| Column           | XSELECT™ CSH™ C18 column<br>(2.1 × 100 mm, 2.5 µm)<br>(Waters, Milford, MA, USA) |                             | Scan type                   | Multiple reaction monitoring (MRM)                  |                  |                 |             |
| Column oven      | Room temperature                                                                 |                             | Ion spray voltage (IS)      | -4500 V                                             |                  |                 |             |
| Eluent A         | 0.05% acetic acid in water                                                       |                             | Source temperature          | 350 °C                                              |                  |                 |             |
| Eluent B         | acetonitrile                                                                     |                             | Curtain gas (CUR)           | 25                                                  |                  |                 |             |
| Flow rate        | 0.16 mL/min                                                                      |                             | Collision gas (CAD)         | 7                                                   |                  |                 |             |
| Gradient         | Linear                                                                           |                             | Ion source gas 1 (GS 1)     | 40                                                  |                  |                 |             |
| Composition      | Time (min)                                                                       | %B                          | Ion source gas 2 (GS 2)     | 45                                                  |                  |                 |             |
|                  | 0                                                                                | 2                           | Declustering potential (DP) | -80                                                 |                  |                 |             |
|                  | 5                                                                                | 70                          | Entrance potential (EP)     | -10                                                 |                  |                 |             |
|                  | 9                                                                                | 98                          | Compound                    | Precursor ion                                       | CXP <sup>a</sup> | CE <sup>b</sup> | Product ion |
|                  | 13                                                                               | 98                          | 8-iso-PGF <sub>2α</sub>     | m/z 353                                             | -13              | -34             | m/z 193     |
|                  | 14                                                                               | 2                           |                             |                                                     |                  | -31             | m/z 247     |
| 21               | 2                                                                                | 8-iso-PGF <sub>2α</sub> -d4 | m/z 357                     | -15                                                 | -35              | m/z 197         |             |

<sup>a</sup>Collision cell exit potential.

<sup>b</sup>Collision energy.

Supplementary Table S3. Summary of validation results from the analytical methods used in the present study.

| Compound                 | Linear range (ng/mL) | R <sup>2</sup> | LOQ <sup>a</sup> (ng/L) | Recovery (%) | RSD <sup>b</sup> (%) | Reference                        |
|--------------------------|----------------------|----------------|-------------------------|--------------|----------------------|----------------------------------|
| 8-iso-PGF <sub>2α</sub>  | 0.1 – 100            | 0.999          | 0.3                     | 103 – 113    | 3 – 7                | Ryu et al. (2015) <sup>1</sup>   |
| trans-3'-hydroxycotinine | 0 – 600              | 0.999          | 1.9                     | 87           | 8                    | Senta et al. (2015) <sup>3</sup> |
| ethyl sulfate            | 2 – 200              | 0.998          | 1000                    | 98           | 7                    | Reid et al. (2011) <sup>4</sup>  |

<sup>a</sup>Limit of quantification

<sup>b</sup>Relative standard deviation



Supplementary Table S4. Parameters used in Monte Carlo simulations to estimate daily mass loads (mg/day/1000 inhabitants) of 8-iso-PGF<sub>2α</sub><sup>a</sup>.

|                  | Sampling<br>uncertainty (U <sub>s</sub> ) | Measured<br>Concentration (C) | Daily volume of<br>wastewater (V) | Population (P)    | Per capita daily<br>mass load (L) | Total uncertainty<br>(U <sub>t</sub> ) |
|------------------|-------------------------------------------|-------------------------------|-----------------------------------|-------------------|-----------------------------------|----------------------------------------|
| Norwegian cities | Normal (1, $\frac{0.05}{\sqrt{8}}$ )      | Normal (C, 0.068*C)           |                                   |                   |                                   |                                        |
| Milan            | Normal (1, $\frac{0.05}{\sqrt{7}}$ )      | Normal (C, 0.068*C)           | Normal (V, 0.2*V)                 | Normal (P, 0.2*P) | $U_s \cdot \frac{C \cdot V}{P}$   | $\frac{SD(L)}{Mean(L)}$                |
| The rest         | Normal (1, $\frac{0.05}{\sqrt{4}}$ )      | Normal (C, 0.068*C)           |                                   |                   |                                   |                                        |

<sup>a</sup>Normal (mean, SD) specifies a normal distribution with the entered mean and standard deviation.

## References

1. Ryu, Y., Reid, M. J. & Thomas, K. V. Liquid chromatography–high resolution mass spectrometry with immunoaffinity clean-up for the determination of the oxidative stress biomarker 8-iso-prostaglandin F2alpha in wastewater. *J. Chromatogr. A* **1409**, 146–151 (2015).
2. Ryu, Y. *et al.* Comparative measurement and quantitative risk assessment of alcohol consumption through wastewater-based epidemiology: An international study in 20 cities. *Sci. Total Environ.* doi:10.1016/j.scitotenv.2016.04.138
3. Senta, I., Gracia-Lor, E., Borsotti, A., Zuccato, E. & Castiglioni, S. Wastewater analysis to monitor use of caffeine and nicotine and evaluation of their metabolites as biomarkers for population size assessment. *Water Res.* **74**, 23–33 (2015).
4. Reid, M. J., Langford, K. H., Mørland, J. & Thomas, K. V. Analysis and Interpretation of Specific Ethanol Metabolites, Ethyl Sulfate, and Ethyl Glucuronide in Sewage Effluent for the Quantitative Measurement of Regional Alcohol Consumption. *Alcohol. Clin. Exp. Res.* **35**, 1593–1599 (2011).
